# Supplementary material for: MrTPS3 and MrTPS20 Are Responsible for β-Caryophyllene and α-Pinene Production, Respectively, in Red Bayberry (Morella rubra)
Source: Front Plant Sci. 2022 Jan 7;12:798086. doi: 10.3389/fpls.2021.798086 (PMC8777192; doi:10.3389/fpls.2021.798086)
Supplement: Supplementary file 5 [file Table_4.XLSX]

## Sheet: Sheet1
Table S8. GC-MS data for MrTPS3-XY enzymic assay using FPP as a substrate
No.	Retension time	Scan No.	Area (Ab*s)	Baseline hight	Absolute height (Ab)	Matched compound	Molecular weight	CAS
1	0.579	137	1668005	37410	41227	Cyclotrisiloxane, hexamethyl-	222.056	000541-05-9
2	0.712	174	370552	7305	11093	Cyclotrisiloxane, hexamethyl-	222.056	000541-05-9
3	0.852	213	206352	4239	7998	.alpha.-d-Mannofuranoside, isopropyl-	222.11	1000150-20-2
4	0.934	236	138559	4184	7926	9-Borabicyclo[3.3.1]nonane, 9-[3-(dimethylamino)propyl]-	207.216	1000160-35-2
5	1.394	364	6706763	47432	51077	Cyclotrisiloxane, hexamethyl-	222.056	000541-05-9
6	1.505	395	3807876	50805	54427	Cyclotrisiloxane, hexamethyl-	222.056	000541-05-9
7	1.613	425	7059963	49472	53071	Cyclotrisiloxane, hexamethyl-	222.056	000541-05-9
8	1.846	490	3140664	50250	53800	Cyclotrisiloxane, hexamethyl-	222.056	000541-05-9
9	1.936	515	1629104	48023	51554	5-Methyl-2-phenylindolizine	207.105	036944-99-7
10	1.986	529	1409816	45764	49285	Cyclotrisiloxane, hexamethyl-	222.056	000541-05-9
11	2.072	553	2763508	45967	49469	Cyclotrisiloxane, hexamethyl-	222.056	000541-05-9
12	2.165	579	8641119	45742	49225	Cyclotrisiloxane, hexamethyl-	222.056	000541-05-9
13	2.524	679	4123499	42707	46114	1H-Indole, 1-methyl-2-phenyl-	207.105	003558-24-5
14	2.675	721	1574596	40632	44007	Cyclotrisiloxane, hexamethyl-	222.056	000541-05-9
15	2.75	742	3057986	41056	44416	Cyclotrisiloxane, hexamethyl-	222.056	000541-05-9
16	2.894	782	3927790	41196	44526	Cyclotrisiloxane, hexamethyl-	222.056	000541-05-9
17	3.156	855	7620608	69075	72350	trans-4-(2-(5-Nitro-2-furyl)vinyl)-2-quinolinamine	281.08	000847-10-9
18	3.457	939	702919	12223	15434	Trichloromethane	117.914	000067-66-3
19	3.798	1034	2991153	25740	28880	Cyclotetrasiloxane, octamethyl-	296.075	000556-67-2
20	3.902	1063	5191892	26660	29778	Cyclotetrasiloxane, octamethyl-	296.075	000556-67-2
21	4.24	1157	1328294	22215	25261	7H-Dibenzo[b,g]carbazole, 7-methyl-	281.12	003557-49-1
22	4.351	1188	1383480	21458	24482	Cyclotetrasiloxane, octamethyl-	296.075	000556-67-2
23	4.688	1282	6915269	28396	31348	Phenol, 4-[2-(5-nitro-2-benzoxazolyl)ethenyl]-	282.064	319490-19-2
24	4.939	1352	1158307	22658	25558	Cyclotetrasiloxane, octamethyl-	296.075	000556-67-2
25	5.033	1378	2730223	23797	26677	Cyclotetrasiloxane, octamethyl-	296.075	000556-67-2
26	5.316	1457	630027	6271	9091	Benzaldehyde, 2-nitro-, diaminomethylidenhydrazone	207.076	102632-31-5
27	5.521	1514	202453	3711	6488	1,3,5-Triazine, 2-chloro-4,6-bis(methylthio)-	206.969	004407-40-3
28	5.618	1541	253773	4129	6886	Benzonitrile, m-phenethyl-	207.105	034176-91-5
29	5.783	1587	517651	3833	6555	Benzoic acid, 2,4,6-trichloro-	223.92	000050-43-1
30	6.073	1668	87673	2832	5493	3,3'-Iminobispropylamine	131.142	000056-18-8
31	6.364	1749	365701	2703	5303	1-Methylsulfonyl, 7,10-dimethyl 1,4,7,10-tetraaza-12-crown-4	292.193	099892-22-5
32	6.906	1900	698611	6100	8635	Ethylbenzene	106.078	000100-41-4
33	7.175	1975	222057	3623	6146	Benzonitrile, m-phenethyl-	207.105	034176-91-5
34	7.408	2040	592895	6656	9169	o-Xylene	106.078	000095-47-6
35	7.52	2071	617248	7140	9647	2(1H)-Quinolinone, 4-hydroxy-6-methoxy-3-(phenylmethyl)-	281.105	1000350-34-1
36	7.731	2130	153159	4281	6779	1,3-Cyclopentadiene, 5-(1-methylethylidene)-	106.078	002175-91-9
37	7.792	2147	671245	4814	7309	Ethylbenzene	106.078	000100-41-4
38	8.079	2227	304253	4705	7188	Cyclopentene, 1-ethenyl-3-methylene-	106.078	061142-07-2
39	8.259	2277	170341	3737	6211	1,3,5-Triazine, 2-chloro-4,6-bis(methylthio)-	206.969	004407-40-3
40	8.392	2314	297215	3881	6350	1-(3,4-Methylenedioxyphenyl)-2-propanone oxime, methyl ether	207.09	1000121-45-7
41	8.589	2369	536152	9062	11521	Propanoic acid, 2,2-dimethyl-3-oxo-3-(phenylamino)-	207.09	072708-59-9
42	8.923	2462	2107243	82964	85409	4-Acetyloxyimino-6,6-dimethyl-3-methylsulfanyl-4,5,6,7-tetrahydro-benzo[c]thiophene-1-carboxylic acid methyl ester	341.076	1000301-45-7
43	9.318	2572	10450818	91966	94392	Acetamide, 2-(4-trifluoromethyl-6-methyl-2-pyrimidylthio)-N-(5-methyl-3-isoxazolyl)-	332.055	1000276-80-4
44	9.587	2647	1953277	33828	36243	Benzeneethanamine, N-[(pentafluorophenyl)methylene]-.beta.,4-bis[(trimethylsilyl)oxy]-	475.142	055429-85-1
45	9.784	2702	14154029	233557	235963	D-Limonene	136.125	005989-27-5
46	10.24	2829	26936071	208585	210970	Limonene	136.125	000138-86-3
47	10.469	2893	22493587	265378	267753	Limonene	136.125	000138-86-3
48	10.599	2929	21380731	229735	232104	Methyl 2-[4-chlorophenyl]-7-chloro-6-methoxy-4-quinolyl ketone	345.032	1000256-39-6
49	10.746	2970	11080294	244545	246907	Limonene	136.125	000138-86-3
50	10.839	2996	14041588	223678	226036	Benzene, 1,3,5-tribromo-2-methoxy-	341.789	000607-99-8
51	11.162	3086	21824415	190864	193208	Bicyclo[2.2.1]heptane, 2-methyl-3-(1-methylethenyl)-	150.141	062337-89-7
52	11.471	3172	5043783	176839	179169	9-Oxa-bicyclo[3.3.1]non-6-en-2-ol	140.084	1000190-14-2
53	11.525	3187	6884839	182633	184960	Propenamide, 3-phenyl-N-[3-(2-benzoxazolyl)phenyl]-	340.121	294874-84-3
54	11.887	3288	14637942	289780	292091	1,3,4-Thiadiazole-2-thiol, 5-(4-methoxyphenylamino)-	239.019	037844-24-9
55	12.02	3325	27294662	451054	453359	1,4-Bis(dicyanomethylene)cyclohexane	208.075	001518-15-6
56	12.138	3358	18795458	568701	571001	1H-1-Benzazepine-2,5-dione, 4-bromo-3-hydroxy-	266.953	052280-66-7
57	12.436	3441	5722697	162999	165286	Thiocyanic acid, 2,4-dinitrophenyl ester	224.984	001594-56-5
58	12.709	3517	8440730	118623	120897	Diethyl 3-phenyl-1,1-cyclobutanedicarboxylate	276.136	001769-72-8
59	12.806	3544	10465232	119590	121860	Pyridine, 4-(2H-tetrazol-5-yl)-	147.054	1000315-87-3
60	12.942	3582	13563450	96973	99237	2-Benzyl-6-methyl-2-phenyl-2,3-dihydro-1,3-oxazin-4-one	279.126	018275-00-8
61	13.351	3696	5336898	106612	108858	Benzene, 4-ethyl-1,2-dimethyl-	134.11	000934-80-5
62	13.47	3729	2814084	45436	47676	Benzene, 1-methyl-3-(1-methylethyl)-	134.11	000535-77-3
63	13.656	3781	17311180	318843	321074	2-Octanone	128.12	000111-13-7
64	13.846	3834	12477041	138259	140482	2-Octanone	128.12	000111-13-7
65	13.972	3869	5062696	134115	136333	2-Octanone	128.12	000111-13-7
66	14.044	3889	11111957	143571	145785	2-Octanone	128.12	000111-13-7
67	14.212	3936	3648949	88408	90614	2-Octanone	128.12	000111-13-7
68	14.352	3975	642233	18316	20516	1-Pyrazolidinecarboxamide, N-phenyl-	191.106	139193-02-5
69	14.517	4021	5116899	57475	59668	Acetic acid, (2,4,5-trichlorophenoxy)-, 2-methylpropyl ester	309.993	004938-72-1
70	14.783	4095	1282870	36754	38935	N,N'-Dicarbethoxy-N-[2,4-diamino-6-chloro-5-pyrimidinyl]hydrazine	318.084	049810-01-7
71	15.099	4183	307045	7095	9261	1,3;2,5-Dimethylene-4-methyl-d-rhamnitol	204.1	007464-25-7
72	15.199	4211	257152	5853	8015	2,5-Octadecadiynoic acid, methyl ester	290.225	057156-91-9
73	15.314	4243	302379	6043	8200	Dispiro[2.2.2.2]deca-4,9-diene	132.094	036262-33-6
74	15.422	4273	260937	6616	8769	1,1-Difluoro-2-methyl-3-methylenecyclopropane	104.044	1000322-28-0
75	15.501	4295	856827	8437	10586	2(1H)-Pyridinone, 4,6-dimethyl-3-nitro-	168.053	1000338-00-7
76	15.738	4361	803921	8286	10424	Ethane, 1-(2-chloroethyl)thio-2-methoxy-	154.022	091159-34-1
77	15.996	4433	1403194	18148	20274	Trachylobane	272.25	005282-35-9
78	16.157	4478	1787868	37525	39644	Benzene, 1,2-dibromo-4-(chlorodifluoromethoxy)-	333.821	1000268-57-6
79	16.462	4563	1496576	37544	39649	9-Borabicyclo[3.3.1]nonane, 9-(1-methylethyl)-	164.174	051475-51-5
80	16.642	4613	2944984	90381	92479	Benzoic acid, 2-[(3,4-dihydro-2H-1,5,3-benzodioxaphosphepin-3-yl)oxy]-, methyl ester, p-oxide	334.061	1000319-39-6
81	16.707	4631	1409035	67016	69110	3,6-Dimethoxy-2,5-dinitrobenzaldehyde oxime	271.044	1000214-37-1
82	16.796	4656	1016571	17219	19310	1-(2-Acetoxyethyl)-3,6-diazahomoadamantan-9-one oxime	267.158	1000216-28-7
83	17.065	4731	432525	8693	10772	Heptanoic acid, butyl ester	186.162	005454-28-4
84	17.363	4814	4624927	99108	101173	2-Chloro-4-(4-methoxyphenyl)-6-(4-nitrophenyl)pyrimidine	341.057	063673-76-7
85	17.611	4883	5215611	187746	189799	Furoxan, 4-nitro-3-phenyl-, 2-oxide	207.028	049558-03-4
86	17.697	4907	4173412	151963	154012	2-[6-Methoxy-8-quinolylamino]cyclohexanone	270.137	1000250-97-6
87	17.841	4947	9081901	272818	274862	N-(4-Bromophenyl)-N'-phenyl-urea	290.005	013114-92-6
88	17.909	4966	15838992	307818	309859	Quinazolin-4(3H)-one, 2-[2-(hydroxyphenyl)ethenyl]-3-methyl-	278.106	050830-07-4
89	18.146	5032	13651022	305866	307896	Acetic acid, 2-(6-chloropyrimidin-4-yl)-2-cyano-, ethyl ester	225.031	1000264-26-9
90	18.429	5111	73833811	793271	795287	4-(3-Bromo-4-methoxyphenyl)-2,3-dihydro-1H-1,5-benzodiazepin-2-one	344.016	1000298-85-0
91	18.594	5157	21061916	298955	300964	4-Bromo-6-chloro-2-benzoxazolinone	246.904	313503-21-8
92	18.784	5210	779184	25455	27456	6-Nitro-m-tolunitrile	162.043	064113-86-6
93	19.186	5322	2745322	33576	35559	Androstan-16-one, (5.alpha.)-	274.23	001032-16-2
94	19.269	5345	1088194	32077	34056	3-(4-Bromo-2-methylphenyl)-2-mercapto-3,4-dihydroquinazolin-4-one	345.978	282729-76-4
95	19.333	5363	1021075	26536	28512	Acetic acid, 2-[4-(1H-1,2,3,4-tetrazol-1-yl)phenoxy]-	220.06	1000349-92-0
96	19.391	5379	515253	10077	12050	17-(1-Hydroxyethyl)-10-methyl-2,3-benzo-1,4,7,13-tetraoxa-10-aza-2-cyclopentadcene	325.189	1000111-12-1
97	19.592	5435	4255340	176175	178153	Benzothiophene-3(2H)-one, 2-(3-nitrobenzylideno)-	283.03	307343-52-8
98	19.922	5527	441305905	7685054	7687078	Cyclohexane, 1,2-dimethyl-	112.125	000583-57-3
99	20.152	5591	9365070	119006	121061	Benzene, (2-methyl-1-propenyl)-	132.094	000768-49-0
100	20.428	5668	1673280	21699	23793	Cyclohexane, 1,2-dimethyl-, cis-	112.125	002207-01-4
101	20.927	5807	15143541	302392	304556	.alpha.-Cubebene	204.188	017699-14-8
102	21.257	5899	9202262	165574	167784	Cyclohexane, 1-methylene-4-(1-methylethenyl)-	136.125	000499-97-8
103	21.44	5950	75165881	1521954	1524190	Cyclohexene, 4-ethenyl-4-methyl-3-(1-methylethenyl)-1-(1-methylethyl)-, (3R-trans)-	204.188	020307-84-0
104	21.856	6066	3577626	57681	59975	Naphthalene, 1,2,3,4,4a,7-hexahydro-1,6-dimethyl-4-(1-methylethyl)-	204.188	016728-99-7
105	21.993	6104	792380	14491	16804	1,4-Methanocycloocta[d]pyridazine, 1,4,4a,5,6,9,10,10a-octahydro-11,11-dimethyl-, (1.alpha.,4.alpha.,4a.alpha.,10a.alpha.)-	204.163	1000221-85-9
106	22.197	6161	5246429	82991	85333	.alpha.-Cubebene	204.188	017699-14-8
107	22.513	6249	1178344	22617	25003	Spiro[2.5]octane, 3,3-dimethyl-2-(1-buten-3-on-1-yl)-	206.167	1000197-07-6
108	22.689	6298	1188373	28798	31208	1-Hexanol, 2-ethyl-	130.136	000104-76-7
109	22.768	6320	1182558	58486	60907	E,E-2,13-Octadecadien-1-ol	266.261	1000131-09-8
110	22.868	6348	1318109	30248	32684	3-Nonanol	144.151	000624-51-1
111	23.148	6426	19263813	246899	249374	5,16-Pregnenolone oxime	329.235	001045-71-2
112	23.245	6453	13598874	328623	331111	Benzenamine, N-2-butenyl-N-methyl-	161.12	030211-55-3
113	23.338	6479	15947078	302879	305380	2,4-Diamino-6-(1,2-dioxo-2-phenylethyl)pteridine	294.087	1000254-43-6
114	23.424	6503	9657178	237085	239599	Amido-N-ethylbromoazepam	343.032	1000079-55-4
115	23.539	6535	10173900	199730	202259	2-Propene(dithioic) acid, 3-(4-bromophenyl)-3-hydroxy-, methyl ester	287.928	056247-41-7
116	23.694	6578	8397623	251618	254169	Benzoisofuran-1-one, 1,3-dihydro-6,7-dimethoxy-3-(4,5,6,7-tetrahydrobenzothiazol-2-yl)amino-	346.099	1000295-73-5
117	23.991	6661	12865262	246510	249103	.alpha.-Cubebene	204.188	017699-14-8
118	24.243	6731	3467942	83907	86535	2',6'-Dihydroxyacetophenone, bis(trimethylsilyl) ether	296.126	1000352-81-3
119	24.591	6828	2569448	63863	66539	4-Hydroxymandelic acid, ethyl ester, di-TMS	340.153	1000071-53-3
120	24.741	6870	11363149	312839	315537	1,6-Octadien-3-ol, 3,7-dimethyl-	154.136	000078-70-6
121	24.978	6936	367905	7863	10593	Ethane, 1,2-Bis(1-phenylcyclopropyl)-	262.172	1000210-95-2
122	25.136	6980	12177484	163871	166623	Naphthalene, 1,2,3,4,4a,5,6,8a-octahydro-7-methyl-4-methylene-1-(1-methylethyl)-, (1.alpha.,4a.alpha.,8a.alpha.)-	204.188	030021-74-0
123	25.438	7064	4976552	116474	119269	Ledol	222.198	000577-27-5
124	25.743	7149	44289045	671227	674064	Cyclohexane, 1-ethenyl-1-methyl-2,4-bis(1-methylethenyl)-, [1S-(1.alpha.,2.beta.,4.beta.)]-	204.188	000515-13-9
125	26.033	7230	2195452	27866	30745	Benzonitrile	103.042	000100-47-0
126	26.242	7288	26143468	605472	608380	1,2,4-Metheno-1H-indene, octahydro-1,7a-dimethyl-5-(1-methylethyl)-, [1S-(1.alpha.,2.alpha.,3a.beta.,4.alpha.,5.alpha.,7a.beta.,8S*)]-	204.188	022469-52-9
127	26.514	7364	3415795	73789	76735	(+)-Epi-bicyclosesquiphellandrene	204.188	054324-03-7
128	26.69	7413	19277649	503903	506873	1H-Cycloprop[e]azulene, decahydro-1,1,7-trimethyl-4-methylene-, [1aR-(1a.alpha.,4a.beta.,7.alpha.,7a.beta.,7b.alpha.)]-	204.188	025246-27-9
129	26.931	7480	7661917	149045	152049	Naphthalene, 1,2,3,4,4a,5,6,8a-octahydro-7-methyl-4-methylene-1-(1-methylethyl)-, (1.alpha.,4a.alpha.,8a.alpha.)-	204.188	030021-74-0
130	27.218	7560	31084893	436931	439975	1,5-Cyclodecadiene, 1,5-dimethyl-8-(1-methylethylidene)-, (E,E)-	204.188	015423-57-1
131	27.401	7611	2720016	38181	41251	Cyclohexene, 6-ethenyl-6-methyl-1-(1-methylethyl)-3-(1-methylethylidene)-, (S)-	204.188	005951-67-7
132	27.566	7657	1168297	19244	22336	1,3a-Ethano-3aH-indene, 1,2,3,6,7,7a-hexahydro-2,2,4,7a-tetramethyl-, [1R-(1.alpha.,3a.alpha.,7a.alpha.)]-	204.188	004545-68-0
133	27.878	7744	15667209	178889	182026	Naphthalene, 1,2,3,5,6,8a-hexahydro-4,7-dimethyl-1-(1-methylethyl)-, (1S-cis)-	204.188	000483-76-1
134	28.061	7795	21466251	508495	511657	Bicyclo[4.4.0]dec-1-ene, 2-isopropyl-5-methyl-9-methylene-	204.188	150320-52-8
135	28.187	7830	13527467	189295	192474	(+)-Epi-bicyclosesquiphellandrene	204.188	054324-03-7
136	28.434	7899	1281231	23941	27155	Epizonarene	204.188	041702-63-0
137	28.596	7944	32661385	880911	884148	Naphthalene, 1,2,4a,5,6,8a-hexahydro-4,7-dimethyl-1-(1-methylethyl)-	204.188	000483-75-0
138	28.728	7981	6694787	120332	123587	.delta.-Selinene	204.188	028624-23-9
139	29.077	8078	92096180	2453442	2456746	1,6-Cyclodecadiene, 1-methyl-5-methylene-8-(1-methylethyl)-, [s-(E,E)]-	204.188	023986-74-5
140	29.22	8118	13151034	267312	270636	1,6-Cyclodecadiene, 1-methyl-5-methylene-8-(1-methylethyl)-, [s-(E,E)]-	204.188	023986-74-5
141	29.321	8146	22793754	361210	364548	Naphthalene, 1,2,3,4,4a,5,6,8a-octahydro-7-methyl-4-methylene-1-(1-methylethyl)-, (1.alpha.,4a.alpha.,8a.alpha.)-	204.188	030021-74-0
142	29.435	8178	11954466	254996	258350	Naphthalene, 1,2,3,4,4a,7-hexahydro-1,6-dimethyl-4-(1-methylethyl)-	204.188	016728-99-7
143	29.572	8216	15537878	353656	357029	.alpha.-Muurolene	204.188	010208-80-7
144	29.737	8262	4386720	73646	77043	2-Methyl-4-(4-nitrophenyl)thiazole	220.031	033102-81-7
145	30.006	8337	4379666	81354	84788	Bicyclo[4.4.0]dec-1-ene, 2-isopropyl-5-methyl-9-methylene-	204.188	150320-52-8
146	30.135	8373	1108100	12496	15948	Humulen-(v1)	204.188	1000159-39-4
147	30.408	8449	82756978	2349037	2352527	Naphthalene, 1,2,3,5,6,8a-hexahydro-4,7-dimethyl-1-(1-methylethyl)-, (1S-cis)-	204.188	000483-76-1
148	30.663	8520	1014433	23455	26981	.gamma.-HIMACHALENE	204.188	1000140-08-0
149	30.745	8543	1114979	27013	30550	Methyl m-tolyl carbinol	136.089	1000342-29-9
150	30.867	8577	4961800	106885	110439	Naphthalene, 1,2,3,4,4a,5,6,8a-octahydro-4a,8-dimethyl-2-(1-methylethylidene)-, (4aR-trans)-	204.188	006813-21-4
151	30.975	8607	6191905	151652	155222	Naphthalene, 1,2,3,4,4a,7-hexahydro-1,6-dimethyl-4-(1-methylethyl)-	204.188	016728-99-7
152	31.093	8640	1465834	31479	35066	Copaene	204.188	003856-25-5
153	31.237	8680	16281032	428374	431980	Naphthalene, 1,2,3,4,4a,5,6,8a-octahydro-7-methyl-4-methylene-1-(1-methylethyl)-, (1.alpha.,4a.alpha.,8a.alpha.)-	204.188	030021-74-0
154	31.377	8719	1216563	16834	20460	Isolongifolene, 4,5-dehydro-	202.172	1000152-07-1
155	31.581	8776	1589488	17895	21549	2,6-Dimethylbenzaldehyde	134.073	001123-56-4
156	32.041	8904	11909695	289098	292817	Cyclohexane, 1-ethenyl-1-methyl-2-(1-methylethenyl)-4-(1-methylethylidene)-	204.188	003242-08-8
157	32.141	8932	35941954	583229	586962	Naphthalene, 1,2,3,4-tetrahydro-1,6-dimethyl-4-(1-methylethyl)-, (1S-cis)-	202.172	000483-77-2
158	32.349	8990	546424	14112	17874	3-Methylquinoline-1-oxide	159.068	001873-55-8
159	32.504	9033	1302238	18211	21995	Naphthalene, 1,2,3,4-tetrahydro-1,1,6-trimethyl-	174.141	000475-03-6
160	32.683	9083	2848200	29041	32850	Tris(trimethylsilyl)borate	278.136	004325-85-3
161	32.988	9168	486316	9739	13591	Benzaldehyde, 2,4,5-trimethyl-	148.089	005779-72-6
162	33.182	9222	687846	10552	14430	6-Amino-2,4-dimethyl-5-methoxyquinoline	202.111	084264-47-1
163	33.304	9256	529691	10924	14820	Propanoic acid, 2-methyl-, 1-(1,1-dimethylethyl)-2-methyl-1,3-propanediyl ester	286.214	074381-40-1
164	33.433	9292	804382	17404	21317	4-Chloro-2-trifluoromethylbenzo[h]quinoline	281.022	001700-98-7
165	33.645	9351	371189	6663	10606	(1R,2S,8As)-8-oxo-1-carboxymethyl-1,2,5,5-tetramethyl-trans-decalin	266.188	1000298-98-2
166	33.767	9385	877968	22111	26072	Isolongifolene, 4,5,9,10-dehydro-	200.157	156747-45-4
167	34.036	9460	14797663	410546	414544	Naphthalene, 1,2-dihydro-1,1,6-trimethyl-	172.125	030364-38-6
168	34.381	9556	1104850	11571	15617	Methyl 3-(bromomethylthio)prop-2-enoate	209.935	1000103-96-5
169	34.653	9632	783328	16657	20741	1H-Inden-1-one, 5-amino-2,3-dihydro-	147.068	003470-54-0
170	34.782	9668	918208	18368	22470	Cadina-1(10),6,8-triene	202.172	001460-96-4
171	34.948	9714	1925298	44260	48386	3,8-Dimethyl-1,2,3,4-tetrahydro-.gamma.-carboline	200.131	033657-42-0
172	35.059	9745	1318553	26476	30617	1-Acetyl-2,6-naphthalenediol	202.063	108804-50-8
173	35.342	9824	1210999	17459	21639	Cyclohexadecane	224.25	000295-65-8
174	35.468	9859	1626778	25215	29413	Naphthalene, decahydro-4a-methyl-1-methylene-7-(1-methylethylidene)-, (4aR-trans)-	204.188	000515-17-3
175	35.644	9908	754637	9865	14088	17-Octadecene-9,11-diynoic acid, 8-oxo-, methyl ester	302.188	075112-83-3
176	35.855	9967	789344	18701	22954	Mercaptoacetic acid, bis(trimethylsilyl)-	236.072	006398-62-5
177	35.952	9994	1257323	23558	27824	3-Methylpyridazine	94.053	001632-76-4
178	36.361	10108	447740	3822	8145	2-[2-[2-[2-(2-Methoxyethoxy)ethoxy]ethoxy]ethoxy]ethoxy-trimethylsilane	324.197	1000352-07-5
179	36.774	10223	2044930	31874	36329	Nerolidol 2	222.198	1000285-43-6
180	37.061	10303	4691311	108110	112696	9-Methyl-S-octahydrophenanathracene	200.157	023861-81-6
181	37.219	10347	270407	4550	9206	(2S,2'S)-2,2'-Bis[1,4,7,10,13-pentaoxacyclopentadecane]	438.247	095721-96-3
182	37.413	10401	1305800	27191	31936	4-Chloro-3-fluoroanisole	160.009	000501-29-1
183	37.596	10452	251475	4884	9711	Succinimide, thio-	115.009	004166-00-1
184	37.718	10486	201911	6526	11410	Dehydroelsholtzia ketone	164.084	006138-88-1
185	37.933	10546	290404	4040	9021	D-Glucose, 2,3,5,6-tetra-O-methyl-	236.126	013554-83-1
186	38.181	10615	1238074	25921	31015	Ethanethioamide, N-phenyl-	151.046	000637-53-6
187	38.5	10704	375188	4003	9242	N,N-Dimethyl-5-benzyloxypentylamine	221.178	071126-71-1
188	38.612	10735	425371	5687	10977	[2-[2-[2-[2-[2-[2-(tert-Butyldimethylsilyloxy)ethoxy]ethoxy]ethoxy]ethoxy]ethoxy]ethanol	396.254	1000352-11-0
189	38.787	10784	464638	9527	14896	Carbamic acid, N-(2,3-dimethylphenyl)-, oxiranylmethyl ester	221.105	339273-79-9
190	39.211	10902	749993	7438	13298	Naphthalene, 1,2,3,4,4a,5,6,8a-octahydro-7-methyl-4-methylene-1-(1-methylethyl)-, (1.alpha.,4a.alpha.,8a.alpha.)-	204.188	030021-74-0
191	39.387	10951	1023146	21315	27438	Naphthalene, 1,2,3,5,6,7,8,8a-octahydro-1,8a-dimethyl-7-(1-methylethenyl)-, [1R-(1.alpha.,7.beta.,8a.alpha.)]-	204.188	004630-07-3
192	39.523	10989	662477	8963	15288	1,3-Hexadiene, 4-diethylboryl-3-trimethylsilyl-	236.213	1000155-03-7
193	39.76	11055	432399	6843	13521	2-[2-[2-[2-[2-[2-[2-[2-[2-[2-[2-(2-Methoxyethoxy)ethoxy]ethoxy]ethoxy]ethoxy]ethoxy]ethoxy]ethoxy]ethoxy]ethoxy]ethoxy]ethoxy-trimethylsilane	632.38	1000352-12-3
194	40.072	11142	4318922	111367	118509	Naphthalene, 1,6-dimethyl-4-(1-methylethyl)-	198.141	000483-78-3
195	40.352	11220	1070697	27971	35529	1,4-Methano-1H-indene, octahydro-1,7a-dimethyl-4-(1-methylethenyl)-, [1S-(1.alpha.,3a.beta.,4.alpha.,7a.beta.)]-	204.188	087064-18-4
196	40.56	11278	285337	5313	13184	1-Methoxy-5-dimethyl(ethyl)silyloxy-3-phenylpentane	280.186	1000278-67-9
197	40.811	11348	870182	16549	24795	2,6-Bis(1,1-dimethylethyl)-4-(1-oxopropyl)phenol	262.193	014035-34-8
198	40.951	11387	161268	4073	12526	2-[2-[2-[2-[2-[2-[2-[2-(2-Methoxyethoxy)ethoxy]ethoxy]ethoxy]ethoxy]ethoxy]ethoxy]ethoxy]ethanol	428.262	1000352-04-3
199	41.037	11411	93745	2204	10786	Propionic acid, 3-(allylthio)-, sec-butyl ester	202.103	024382-61-4
200	41.282	11479	298768	6535	15515	4,6-Decadien-3-ol, 2-methyl-9-(2-methoxyethoxymethoxy)-, (E,E)-	272.199	1000156-73-4
201	41.357	11500	238155	7398	16517	3,5-Dimethylthiophenol, S-trimethylsilyl-	210.09	1000353-09-3
202	41.432	11521	279150	5893	15146	3,3'-Isopropylidenebis(1,5,8,11-tetraoxacyclotridecane)	420.272	120343-89-7
203	41.54	11551	202295	6939	16387	3,6-Dioxa-2,7-disilaoctane, 2,2,7,7-tetramethyl-3-[(2-methylphenoxy)methyl]-	326.173	074810-85-8
204	41.648	11581	565975	15073	24721	Silane, [(methylsilyl)methyl](silylmethyl)-	134.04	005695-49-8
205	41.788	11620	3592023	104721	114621	Phenol, 2,4-bis(1,1-dimethylethyl)-	206.167	000096-76-4
206	42.021	11685	1275173	15462	25783	3,3'-Isopropylidenebis(1,5,8,11-tetraoxacyclotridecane)	420.272	120343-89-7
207	42.268	11754	1580703	28453	39221	Solavetivone	218.167	054878-25-0
208	42.57	11838	905573	21823	33141	1,6,10,14-Hexadecatetraen-3-ol, 3,7,11,15-tetramethyl-, (E,E)-	290.261	001113-21-9
209	42.667	11865	880170	21366	32856	Isoquinoline, 4-(methylthio)-	175.046	038896-71-8
210	42.821	11908	568563	9009	20779	Silane, [(methylsilyl)methyl](silylmethyl)-	134.04	005695-49-8
211	42.936	11940	211575	3976	15956	(18S,19S)-18,19-Dihydroxy-1,4,7,10,13,16-hexaoxocycloencosane	324.178	077887-94-6
212	43.173	12006	599776	14108	26517	1,3,4-Trimethoxy-butan-2-ol	164.105	033469-04-4
213	43.266	12032	1661249	41749	54326	Azulene, 1,4-dimethyl-7-(1-methylethyl)-	198.141	000489-84-9
214	43.406	12071	308714	6089	18918	(2S,13S)-12,13-Dihydroxy-1,4,7,10-tetraoxacyclotetradecane	236.126	117666-56-5
215	43.582	12120	30286	1348	14497	Hexaethylene glycol monododecyl ether	450.356	003055-96-7
216	43.628	12133	36360	2049	15283	15-Crown-5	220.131	033100-27-5
217	43.876	12202	444310	4644	18677	1-Methoxy-5-dimethyl(ethyl)silyloxy-3-phenylpentane	280.186	1000278-67-9
218	44.12	12270	626166	11892	26855	2-[2-[2-[2-[2-[2-[2-[2-(Trimethylsilyloxy)ethoxy]ethoxy]ethoxy]ethoxy]ethoxy]ethoxy]ethoxy]ethanol	442.26	1000352-06-4
219	44.479	12370	243884	2848	19314	2-[2-[2-[2-[2-[2-[2-[2-[2-[2-(2-Methoxyethoxy)ethoxy]ethoxy]ethoxy]ethoxy]ethoxy]ethoxy]ethoxy]ethoxy]ethoxy]ethanol	516.315	1000352-04-4
220	44.644	12416	124842	2291	19460	15-Crown-5	220.131	033100-27-5
221	44.924	12494	822340	7564	25904	Silane, methylenebis[methyl-	104.048	005654-05-7
222	45.06	12532	422199	6340	25249	1-Methoxy-5-dimethyl(ethyl)silyloxy-3-phenylpentane	280.186	1000278-67-9
223	45.243	12583	175625	3099	22909	[2-[2-[2-[2-[2-[2-[2-[2-[2-(tert-Butyldimethylsilyloxy)ethoxy]ethoxy]ethoxy]ethoxy]ethoxy]ethoxy]ethoxy]ethoxy]ethanol	528.333	1000352-11-3
224	45.423	12633	219807	5303	26307	1,4,7,10,13,16-Hexaoxacyclooctadecane	264.157	017455-13-9
225	45.577	12676	732386	17256	39264	Phthalic acid, isohexyl pent-2-en-4-yn-1-yl ester	314.152	1000315-45-7
226	45.767	12729	412839	9390	32674	D-Glucose, 2,3,5,6-tetra-O-methyl-	236.126	013554-83-1
227	45.871	12758	479254	8250	32212	(18S,19S)-18,19-Dihydroxy-1,4,7,10,13,16-hexaoxocycloencosane	324.178	077887-94-6
228	46.069	12813	122881	2988	28255	Tetraethyleneglycol monomethylether	208.131	023783-42-8
229	46.237	12860	137999	2895	29281	Silane, [(methylsilyl)methyl](silylmethyl)-	134.04	005695-49-8
230	46.406	12907	353811	5599	33116	Octaethylene glycol monododecyl ether	538.408	003055-98-9
231	46.539	12944	255367	6912	35480	(18S,19S)-18,19-Dihydroxy-1,4,7,10,13,16-hexaoxocycloencosane	324.178	077887-94-6
232	46.812	13020	730373	12238	43440	(2S,2'S)-2,2'-Bis[1,4,7,10,13-pentaoxacyclopentadecane]	438.247	095721-96-3
233	47.081	13095	151074	2045	35840	2-[2-[2-[2-[2-[2-[2-[2-[2-(Trimethylsilyloxy)ethoxy]ethoxy]ethoxy]ethoxy]ethoxy]ethoxy]ethoxy]ethoxy]ethanol	486.286	1000352-06-5
234	47.228	13136	443755	7570	42762	15-Crown-5	220.131	033100-27-5
235	47.353	13171	98342	4362	40860	1,4,7,10,13,16-Hexaoxacyclooctadecane	264.157	017455-13-9
236	47.44	13195	190707	3618	41157	15-Crown-5	220.131	033100-27-5
237	47.641	13251	181000	3140	43707	2-[2-[2-[2-[2-[2-(2-Methoxyethoxy)ethoxy]ethoxy]ethoxy]ethoxy]ethoxy]ethanol	340.21	1000352-04-1
238	47.996	13350	988630	8845	55871	Octaethylene glycol	370.22	1000289-34-2
239	48.236	13417	609325	7716	59108	3,6,9,12-Tetraoxatetradecan-1-ol	222.147	005650-20-4
240	48.645	13531	371003	3810	62586	15-Crown-5	220.131	033100-27-5
241	48.828	13582	204594	6933	69519	3,6,9,12-Tetraoxatetradecan-1-ol	222.147	005650-20-4
242	48.893	13600	52270	4317	68479	Heptaethylene glycol monododecyl ether	494.382	003055-97-8
243	49.446	13754	781655	5074	82651	Silane, methylenebis[methyl-	104.048	005654-05-7
244	49.539	13780	199469	8437	89051	15-Crown-5	220.131	033100-27-5
245	50.063	13926	984035	10520	111598	2-[2-[2-[2-[2-[2-[2-[2-[2-(2-Methoxyethoxy)ethoxy]ethoxy]ethoxy]ethoxy]ethoxy]ethoxy]ethoxy]ethoxy]ethanol	472.288	1000352-11-2
246	50.77	14123	1224585	5203	133950	3,6,9,12-Tetraoxatetradecan-1-ol	222.147	005650-20-4
